# Supplementary material for: Anticancer kiteplatin pyrophosphate derivatives show unexpected target selectivity for DNA
Source: Royal Society of Chemistry journal article supplement (doi:10.1039/c7dt02633a), 2017-01-01
Supplement: c7dt02633a1.pdf [file c7dt02633a1.pdf]

Electronic supplementary information for Dalton Transaction

## Anticancer kiteplatin pyrophosphate derivatives show unexpected target selectivity for DNA

Jana Kasparkova,<sup>a</sup> Hana Kostrhunova,<sup>a</sup> Vojtech Novohradsky,<sup>a</sup> Jitka Pracharova,<sup>b</sup> Alessandra Curci,<sup>c</sup> Nicola Margiotta,<sup>c</sup> Giovanni Natile,<sup>c</sup> and Viktor Brabec<sup>\*a</sup>

<sup>a</sup>*Institute of Biophysics, Academy of Sciences of the Czech Republic, v.v.i., Královopolská 135, CZ-61265 Brno, Czech Republic.*

<sup>b</sup>*Department of Biophysics, Centre of the Region Haná for Biotechnological and Agricultural Research, Palacký University, Šlechtitelů 11, 783 41 Olomouc, Czech Republic.*

<sup>c</sup>*Department of Chemistry, University of Bari "Aldo Moro", Via E. Orabona 4, 70125 Bari, Italy*

### Table of Contents:

|                                                                                                      |    |
|------------------------------------------------------------------------------------------------------|----|
| <b>Figure S1</b> Impedance-based time-dependent profiling of cellular responses to kiteplatin...     | S1 |
| <b>Figure S2</b> Effect of nucleotide excision repair on the sensitivity of cells to kiteplatin..... | S2 |
| <b>Figure S3</b> DNA binding of kiteplatin in cell free media.....                                   | S2 |
| <b>Figure S4</b> Effect of kiteplatin on bacterial morphology.....                                   | S3 |

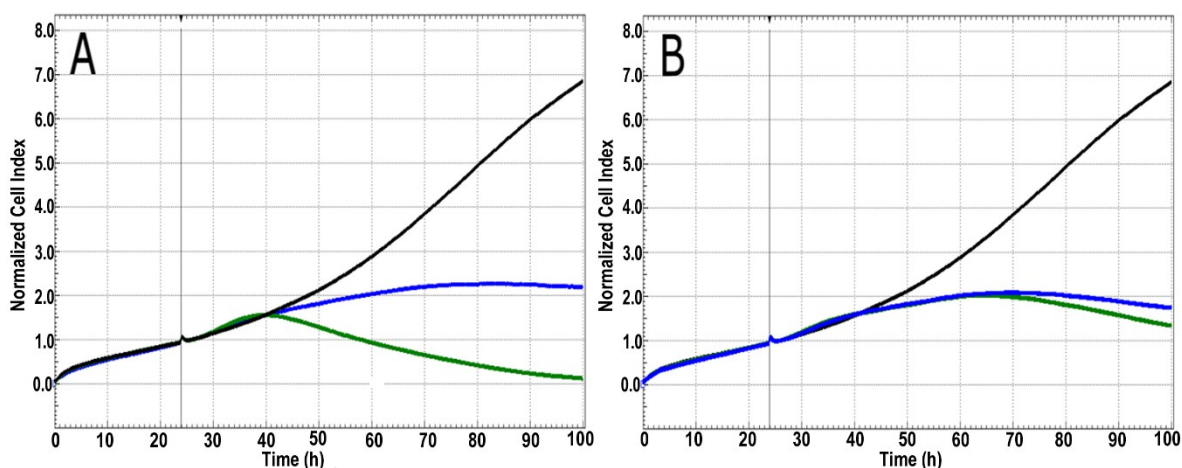

Figure S1: TRC profiles of A2780 cells treated with: A) equimolar (3  $\mu$ M) concentration of kiteplatin (green) and cisplatin (blue), B) equitoxic concentrations of kiteplatin (1  $\mu$ M, green) and cisplatin (5  $\mu$ M; blue). Untreated controls (black). The curves taken at equimolar concentrations (panel B) reflect the significantly higher cytotoxic efficiency of kiteplatin compared to cisplatin (see [Kasparkova, 2010 #370]).

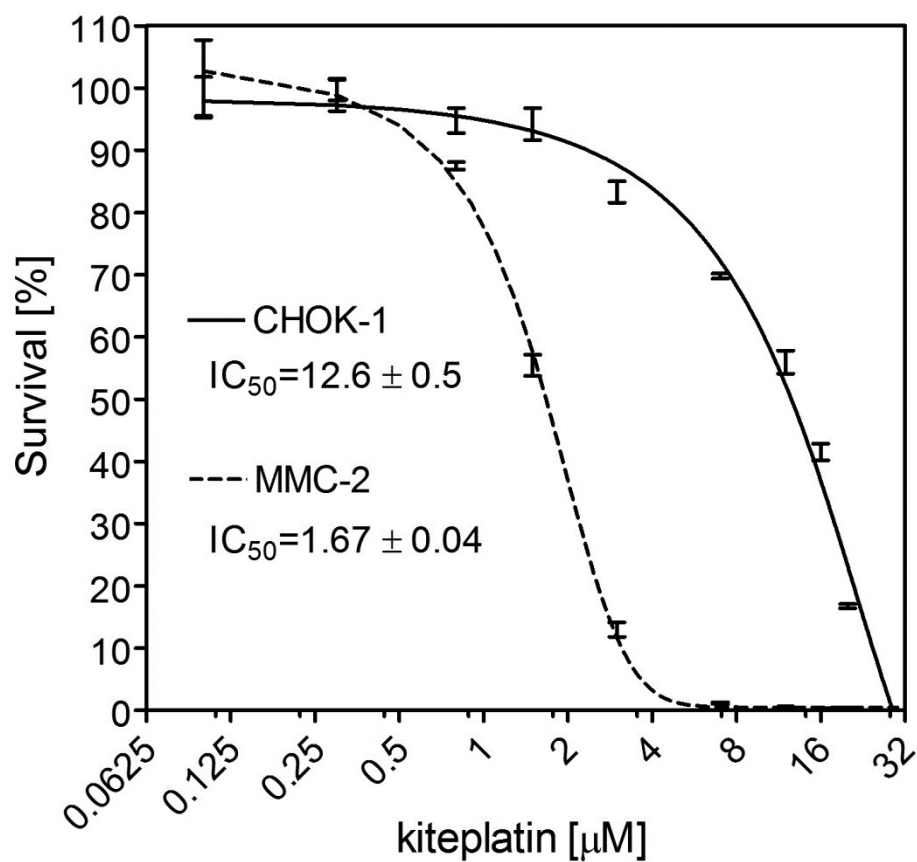

**Fig. S2** Toxic effects of kiteplatin and cisplatin in CHO cells proficient (CHO-K1) or deficient (MMC-2) in nucleotide excision repair. The  $\text{IC}_{50}$  values are related to the concentration of the complex.

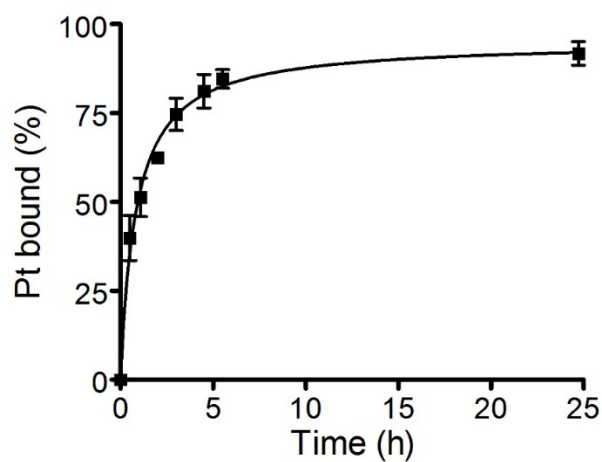

**Fig. S3** Kinetics of DNA platination when CT DNA is incubated with kiteplatin in 10 mM NaClO<sub>4</sub> at 37 °C. The time at which the binding reached 50% ( $t_{50\%}$ ) was  $58 \pm 5$  min, in agreement with already published result [Kasparkova, 2010 #370]. The symbols represent the average values of two independent experiments  $\pm$  SD.

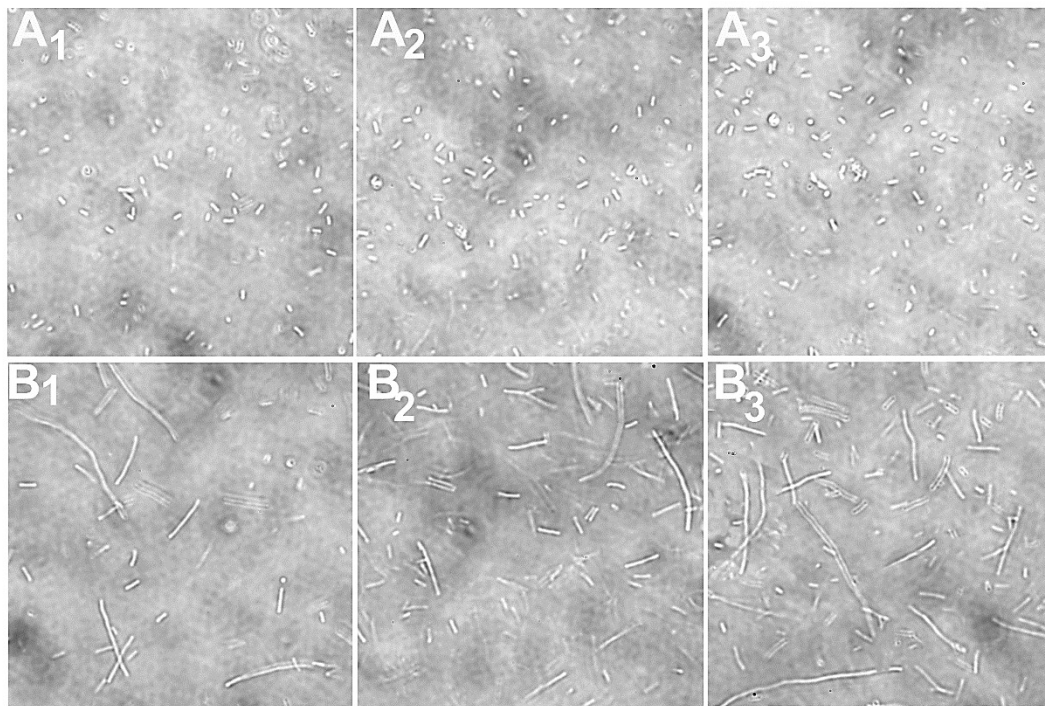

**Fig. S4.** Effect of kiteplatin (panels B), on the morphology of *E. coli* K12 bacteria. Control, untreated bacteria are shown in the panels A. Three representative images of each sample are shown.
